# Supplementary material for: Olivetolic acid, a cannabinoid precursor in Cannabis sativa, but not CBGA methyl ester exhibits a modest anticonvulsant effect in a mouse model of Dravet syndrome
Source: Springer Nature journal article supplement (doi:10.1186/s42238-021-00113-w), 2022-01-04
Supplement: MOESM1 [file 42238_2021_113_MOESM1_ESM.pdf]

## Supplementary Information for

**Olivetolic acid, a cannabinoid precursor in *Cannabis sativa*, but not CBGA methyl ester exhibits a modest anticonvulsant effect in a mouse model of Dravet syndrome**

Lyndsey L. Anderson, Michael Udoh, Declan Everett-Morgan, Marika Heblinski, Iain. S. McGregor, Samuel D. Banister and Jonathon C. Arnold

Jonathon C. Arnold  
Email: [jonathon.arnold@sydney.edu.au](mailto:jonathon.arnold@sydney.edu.au)

**This PDF file includes:**

Supplemental Figures 1 and 2

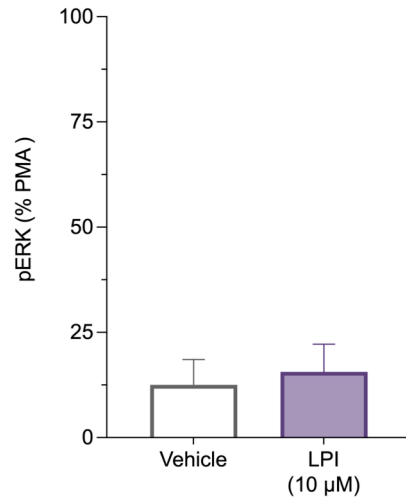

**Supplemental Figure 1. GPR55 negative control experiments.** Control HEK293 cells were used to measure ERK phosphorylation (pERK) following treatment with vehicle or 10 μM lysophosphatidylinositol (LPI). Data are expressed as mean ± SEM normalized to 100 nM phorbol 12-myristate 13-acetate (PMA), with n = 5 per group.

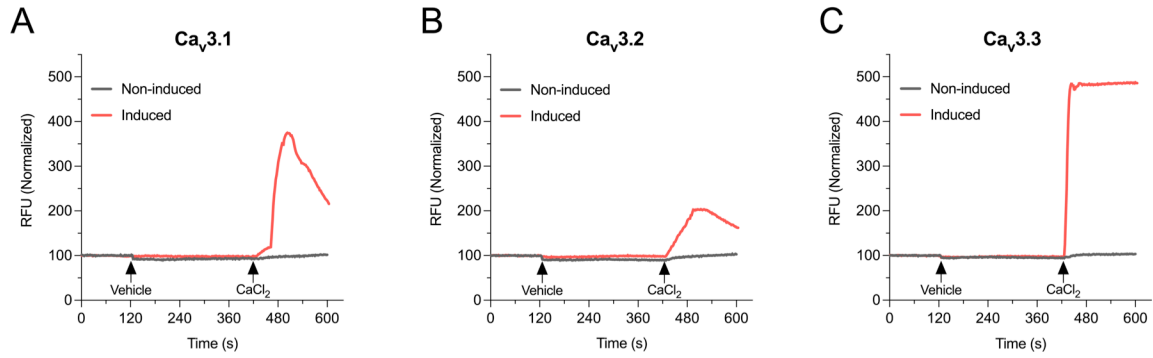

**Supplemental Figure 2. Representative traces of changes in intracellular calcium.** Representative traces recorded from Flp-In™ T-REx™ HEK stably expressing either (A) Ca<sub>v</sub>3.1, (B) Ca<sub>v</sub>3.2 or (C) Ca<sub>v</sub>3.3 were incubated overnight with (induced, red lines) or without (non-induced, gray lines) 2 μg/mL tetracycline. Vehicle was added at 120 s followed by the addition of 10 mM CaCl<sub>2</sub> at 420 s. Data are expressed in relative fluorescence units (RFU) normalized as a percentage to the fluorescence pre-vehicle.
